# Supplementary material
Source: publisher site journal article supplement (https://www.spandidos-publications.com/4634/downloadSupplementary)

Figure S1. TMEM14A showed positive enrichment in glycolysis, MYC and WNT signaling pathway in human OV. (A-C). Gene set enrichment analysis identified (A) glycolysis, (B) MYC and (C) WNT signaling pathway as regulatory targets of TMEM14A in The Cancer Genome Atlas OV dataset respectively. TMEM14A, transmembrane protein 14A; OV, ovarian cancer.

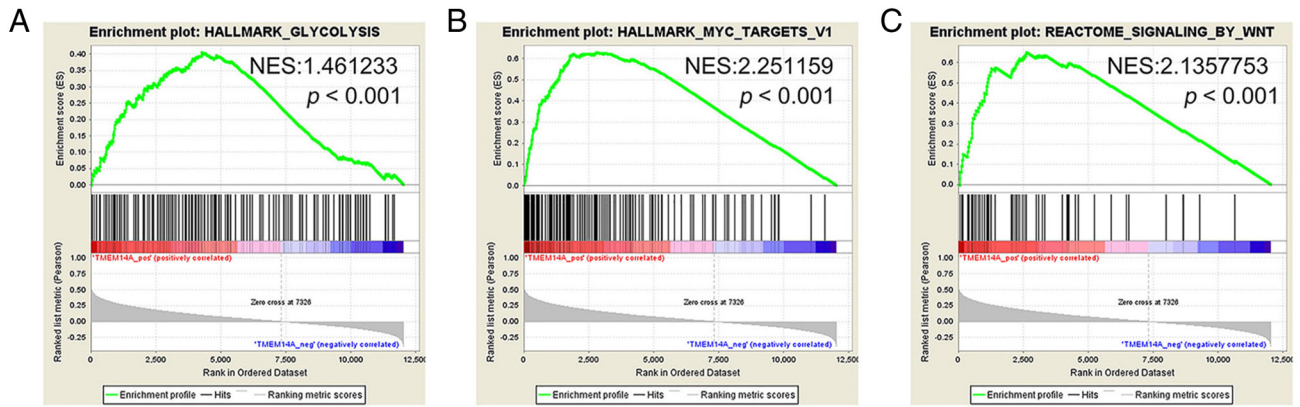

Figure S2. c-Myc is positively correlated with TMEM14A in OV tissues. (A and B) c-Myc overexpression was induced using lentiviral-mediated vector. (C and D) Reverse transcription-quantitative PCR and western blotting were used to examine the relative mRNA and protein levels of TMEM14A in oeNC or oec-Myc transfecting cells. (E and F) c-Myc binds on the promoter of TMEM14A. (G and H) The c-Myc rescued the function of TMEM14A in the (G) proliferation and (H) ECAR of siTMEM14A transfecting cells. (I and J) c-Myc was positively correlated with TMEM14A in human OV tissues. \* $P < 0.05$  and \*\*\* $P < 0.001$ . TMEM14A, transmembrane protein 14A; OV, ovarian cancer; oe, overexpression; NC, negative control; ECAR, extracellular acidification rate; si-, small interfering; WT, wild-type.

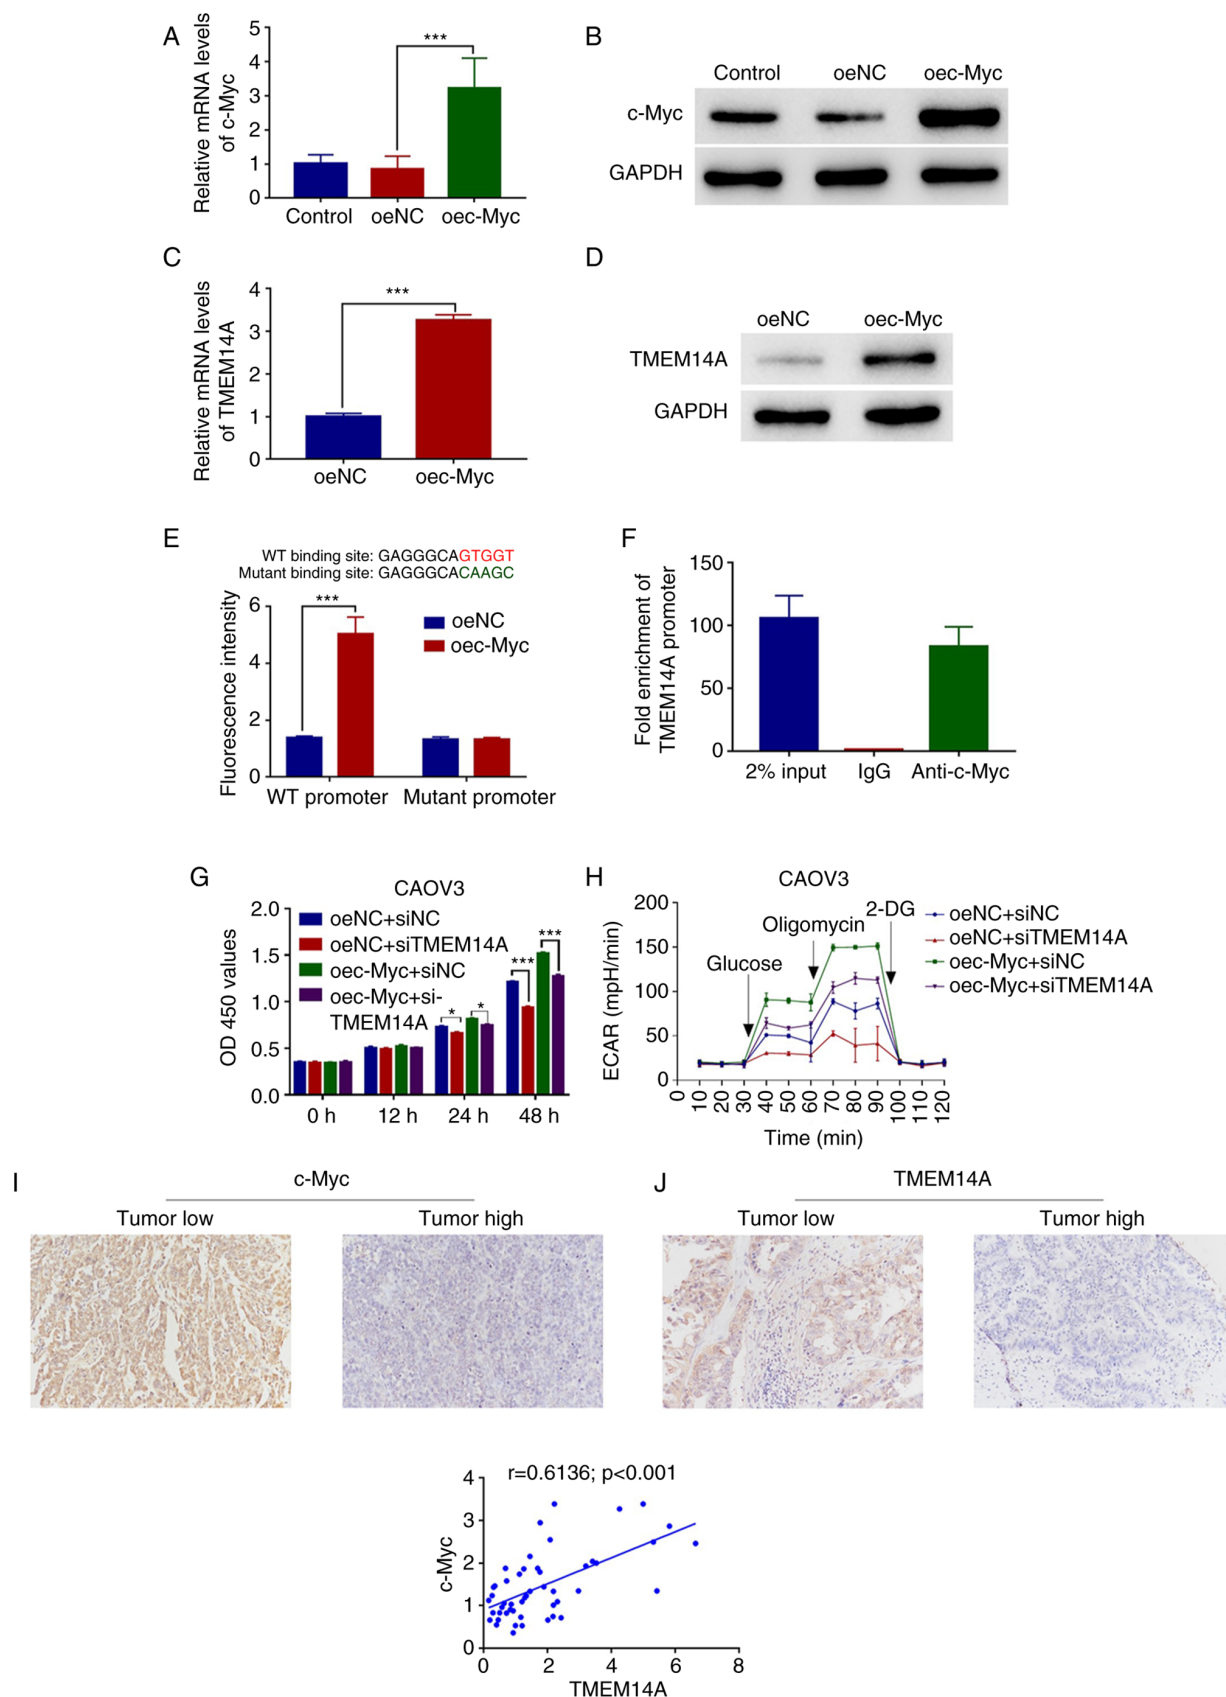

Supplement: Supplementary file 1 [file downloadSupplementary]
